# Supplementary material
Source: PubMed Central journal article supplement (PMC6267944)

## SUPPLEMENTARY METHODS

### *Clinical Trials*

The first study (NCT00401362) was a phase III trial, which enrolled 134 patients, including 78 patients with advanced cancers and 56 patients with other advanced illness including chronic obstructive pulmonary disease (COPD), cardiovascular disease and severe neurologic disease. Patients were randomized to receive a single dose of subcutaneous MNTX ( $N=63$ ; 8mg for patients  $<62$  kg and 12mg for patients  $\geq 62$  kg body weight) or placebo ( $N=71$ ) every other day for 14 days. The co-primary efficacy endpoints of this study were: 1) the proportion of patients with laxation within 4 hours after the first dose of study drug, and 2) the proportion of patients with laxation within 4 hours after 2 of the first 4 doses (the first week of double-blind treatment). Of the patients who completed the double-blind phase, 80 (placebo 39, MNTX 41) elected to proceed with a 12 week open-label phase, during which they could receive one dose of MNTX (0.15 mg/kg subcutaneously, which could be reduced to 0.075 mg/kg or increased to 0.3 mg/kg) as often as every 24 hours as needed. Patients received 30-days follow-up after the last study dose.

The second study (NCT00672477) was a phase IV trial, which enrolled 229 patients (including 151 patients with advanced cancers and 78 patients with cardiovascular, pulmonary or neurologic disorders), who were randomized to a single dose of subcutaneous MNTX ( $N=116$ , 8mg for patients  $<62$  kg and 12mg for patients  $\geq 62$  kg body weight) or placebo ( $N=113$ ) administered every other day for 14 days. The primary endpoint was laxation without any additional rescue medication within 4 hours after at least 2 of the first 4 doses. Of the patients who completed the double-blind phase, 142 (placebo 69, MNTX 73) elected to proceed with a 10-week open label phase of subcutaneous MNTX as needed. Both studies were approved by appropriate Institutional Review Boards.

## SUPPLEMENTARY TABLES

Supplementary Table 1. Patients' characteristics

| Category              | All patients | MNTX       | Placebo    | P value     |
|-----------------------|--------------|------------|------------|-------------|
| All patients          | 229          | 117        | 112        |             |
| Male                  | 124 (54%)    | 64 (55%)   | 60 (54%)   | 0.90        |
| Female                | 105 (46%)    | 53 (45%)   | 52 (46%)   |             |
| Median age (range)    | 63 (27-91)   | 63 (27-91) | 64 (32-90) | 0.82        |
| Albumin <3.5 g/dL     | 94 (41%)     | 44 (38%)   | 50 (45%)   | 0.35        |
| Albumin ≥3.5 g/dL     | 129 (56%)    | 69 (59%)   | 60 (54%)   |             |
| Albumin missing       | 6 (3%)       | 4 (3%)     | 2 (2%)     |             |
| Lung cancer           | 58 (25%)     | 32 (27%)   | 26 (23%)   | 0.54        |
| Prostate cancer       | 30 (13%)     | 13 (11%)   | 17 (15%)   | 0.43        |
| Breast cancer         | 23 (10%)     | 14 (12%)   | 9 (8%)     | 0.38        |
| Pancreatic cancer     | 16 (7%)      | 8 (7%)     | 8 (7%)     | 1.00        |
| Renal cancer          | 12 (5%)      | 8 (7%)     | 4 (4%)     | 0.38        |
| Head and neck cancer  | 11 (5%)      | 6 (5%)     | 5 (4%)     | 1.00        |
| Colorectal cancer     | 10 (4%)      | 4 (3%)     | 6 (5%)     | 0.53        |
| Melanoma              | 8 (3%)       | 3 (3%)     | 5 (4%)     | 0.49        |
| Esophageal cancer     | 7 (3%)       | 3 (3%)     | 4 (4%)     | 0.72        |
| Brain tumor           | 6 (3%)       | 4 (3%)     | 2 (2%)     | 0.68        |
| Hepatocellular cancer | 6 (3%)       | 1 (1%)     | 5 (4%)     | 0.11        |
| Uterine cancer        | 6 (3%)       | 0 (0%)     | 6 (5%)     | <b>0.01</b> |
| Cervical cancer       | 5 (2%)       | 3 (3%)     | 2 (2%)     | 1.00        |
| Lymphoma              | 4 (2%)       | 2 (2%)     | 2 (2%)     | 1.00        |
| Myeloma               | 4 (2%)       | 2 (2%)     | 2 (2%)     | 1.00        |
| Sarcoma               | 3 (1%)       | 1 (1%)     | 2 (2%)     | 0.62        |
| Bladder cancer        | 3 (1%)       | 2 (2%)     | 1 (1%)     | 1.00        |
| Biliary cancer        | 3 (1%)       | 2 (2%)     | 1 (1%)     | 1.00        |
| Other                 | 14 (6%)      | 9 (8%)     | 5 (4%)     | 0.41        |

MNTX, methyl naltrexone

**Supplementary Table 2. Cochrane Collaboration's tool for risk of bias assessment**

| <b>Type of bias</b> | <b>Source of bias</b>                  | <b>Risk of bias</b> | <b>Comment</b>                                                                                                |
|---------------------|----------------------------------------|---------------------|---------------------------------------------------------------------------------------------------------------|
| Selection bias      | Random sequence generation             | Unclear             | Studies were not designed for survival outcomes                                                               |
|                     | Allocation concealment                 | Low                 |                                                                                                               |
| Performance bias    | Blinding of participants and personnel | Low                 |                                                                                                               |
| Detection bias      | Blinding of outcome assessment         | Low                 |                                                                                                               |
| Attrition bias      | Incomplete outcome data                | High                | Studies followed patients only for limited period of time and 58% of patients were censored at last follow up |
| Reporting bias      | Selective reporting                    | Low                 |                                                                                                               |
| Other bias          | Any                                    | Low                 |                                                                                                               |

## SUPPLEMENTARY FIGURE LEGENDS

**Supplementary Figure 1.** Total of 223 patients had available albumin levels at the time of study entry. Patients (n=128, blue) with albumin  $\geq$  3.5 g/dL had longer overall survival (OS) compared to patients (n=95, red) with albumin  $<$  3.5 g/dL (76 days, 95% CI 55-97 vs. 41 days, 95% CI 30-52;  $p < 0.001$ ).

**Supplementary Figure 2. A.** In 58 patients with lungs cancer, 32 patients (blue) treated with methylnaltrexone (MNTX) had statistically similar median overall survival (OS) compared to 26 patients (red) treated with placebo (118 days vs. 56 days;  $p = 0.34$ ). **B.** In 30 patients with prostate cancer, 13 patients (blue) treated with MNTX had similar OS compared to 17 patients (red) treated with placebo (medians not reached;  $p = 0.85$ ). **C.** In 23 patients with breast cancer, 14 patients (blue) treated with MNTX had similar OS compared to 9 patients (red) treated with placebo (medians not reached;  $p = 0.46$ ). **D.** In 16 patients with pancreatic cancer, 8 patients (blue) treated with MNTX had a trend to longer median OS compared to 8 patients (red) treated with placebo (76 days vs. 28 days;  $p = 0.14$ ).

# Supplementary Figure 1

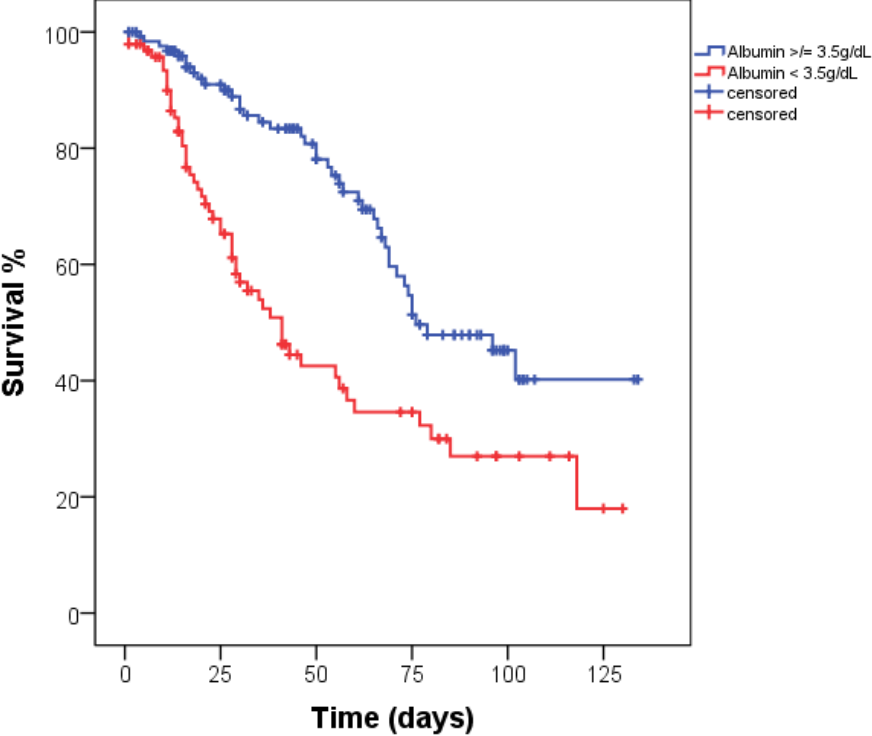

# Supplementary Figure 2

A.

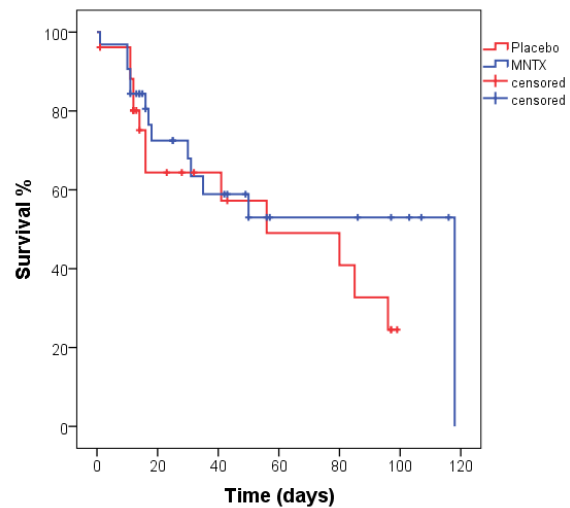

B.

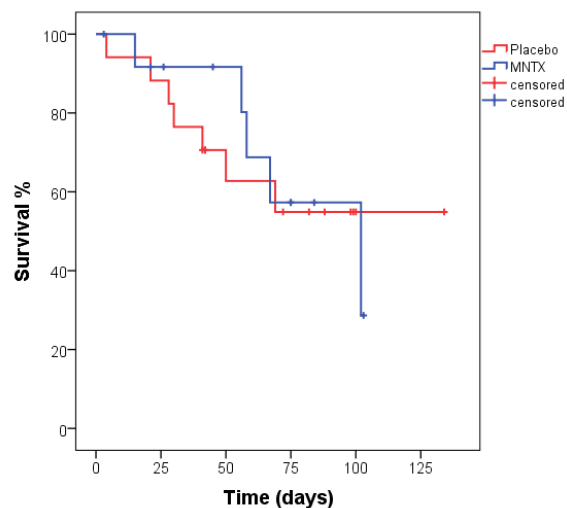

C.

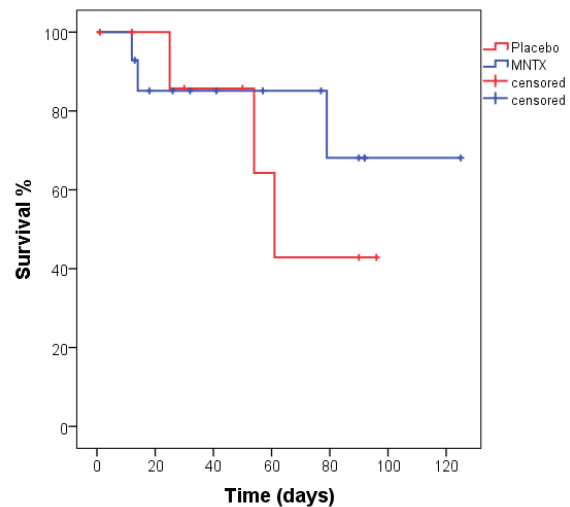

D.

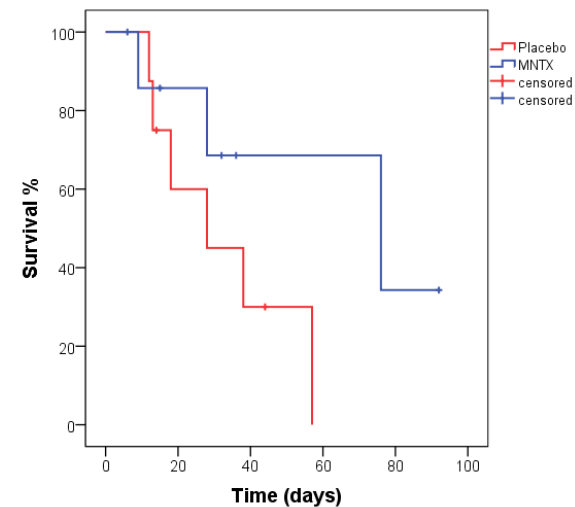

Supplement: mdw317supp.pdf [file mdw317supp.pdf]
